# Supplementary material for: Population genomics of intrapatient HIV-1 evolution
Source: eLife journal article supplement (doi:10.7554/elife.11282), 2015-12-10
Supplement: supp [file elife-11282-supp-v1.zip]

Archive with 12 entries (12 files):
- elife_poa_e11282_Supplementary_File_1.csv
- elife_poa_e11282_Supplementary_File_2.xlsx
- elife_poa_e11282_Figure_4_figure_supplement_2.pdf
- elife_poa_e11282_Figure_1_figure_supplement_1.pdf
- elife_poa_e11282_Figure_1_figure_supplement_2.pdf
- elife_poa_e11282_Figure_6_figure_supplement_1.pdf
- elife_poa_e11282_Figure_3_figure_supplement_1.pdf
- elife_poa_e11282_Figure_9_figure_supplement_2.pdf
- elife_poa_e11282_Supplementary_File_3.xlsx
- elife_poa_e11282_Figure_3_figure_supplement_2.pdf
- elife_poa_e11282_Figure_9_figure_supplement_1.pdf
- elife_poa_e11282_Figure_4_figure_supplement_1.pdf
