# Supplementary material for: Population genomics of intrapatient HIV-1 evolution
Source: eLife journal article supplement (doi:10.7554/elife.11282), 2015-12-10
Supplement: supp [file elife-11282-supp-v1.zip › elife_poa_e11282_Figure_1_figure_supplement_2.pdf]

A detailed phylogenetic tree showing relationships between various taxa labeled p1 through p11. The tree is rooted on the left and branches out to the right. The taxa are color-coded: p1 (light blue), p2 (dark blue), p5 (green), p9 (orange), p8 (red), p11 (purple), and p3 (light green). The tree is set against a light gray background with a white grid. The y-axis on the left is labeled from 0 to 800 in increments of 100.

branch length
