# Supplementary material for: Population genomics of intrapatient HIV-1 evolution
Source: eLife journal article supplement (doi:10.7554/elife.11282), 2015-12-10
Supplement: supp [file elife-11282-supp-v1.zip › elife_poa_e11282_Supplementary_File_1.csv]

id	patient	days since infection	viral load	CD4+ count	templates approx	dilutions	F1	F2	F3	F4	F5	F6	F1_coverage	F2_coverage	F3_coverage	F4_coverage	F5_coverage	F6_coverage
p1_sample_1	p1	122	499	537	33.2666667	1:10 (0/2)	ok	ok	ok	ok	ok	ok	26727	14552	23811	31910	4592	8499
p1_sample_2	p1	562	6900	545	460.0	1:100 (1/2)	ok	ok	ok	ok	end lower	ok	6108	41446	6020	91767	274	26606
p1_sample_3	p1	1084	5700	600	380.0	1:100 (1/2)	ok	ok	ok	ok	low diversity	ok	24651	24046	41170	44892	4120	2861
p1_sample_4	p1	1254	11000	0	733.333333	1:10 (2/2)	ok	ok	ok	ok	low diversity	ok	20832	51492	42740	30537	951	24718
p1_sample_5	p1	1282	11000	560	733.333333	1:100 (1/2)	ok	ok	ok	ok	low diversity	ok	24728	24664	77505	56486	1342	10570
p1_sample_6	p1	1393	6600	510	440.0	1:100 (2/2)	ok	ok	ok	ok	low diversity	ok	65517	52103	32231	226199	3669	29180
p1_sample_7	p1	1861	9800	530	653.333333	1:100 (1/2)	ok	ok	ok	ok	low diversity	ok	31898	2927	36557	2462	975	1723
p1_sample_8	p1	2303	39000	450	2600.0	1:100 (2/2)	ok	ok	ok	ok	low	ok	152535	214437	153444	290064	2305	166923
p1_sample_9	p1	2578	292000	430	19466.6666667	1:1000 (2/2)	ok	ok	ok	ok	low	ok	16890	15263	9839	28125	714	24893
p1_sample_10	p1	2639	240000	580	16000.0	1:10000 (1/2)	ok	ok	ok	ok	low	ok	108683	88683	107479	161563	8496	114572
p1_sample_11	p1	2922	501000	420	33400.0	1:1000 (2/2)	ok	ok	ok	ok	ok	ok	6939	7528	14675	191482	41584	137629
p1_sample_12	p1	2966	648000	340	43200.0	1:10000 (2/2)	ok	ok	ok	ok	ok	ok	3665	5521	6051	6295	6242	5943
p2_sample_1	p2	74	31100	1185	2073.333333	1:100 (1/2)	ok	ok	ok	ok	ok	ok	11299	16532	13906	16126	3176	13094
p2_sample_2	p2	561	1800	1033	120.0	1:10 (2/2)	ok	ok	ok	ok	low diversity	ok	16090	21372	5251	27178	781	7952
p2_sample_3	p2	936	1800	760	120.0	1:10 (1/2)	ok	ok	ok	ok	low diversity	ok	5629	5762	4811	12965	755	1964
p2_sample_4	p2	1255	11700	731	780.0	1:10 (2/2)	ok	ok	ok	ok	low	ok	4965	4739	2912	6628	194	3411
p2_sample_5	p2	1628	1200	644	80.0	1:10 (1/2)	ok	ok	ok	ok	miss	ok	5435	10430	724	19968	0	16200
p2_sample_6	p2	2018	1070	369	71.3333333	1:10 (2/2)	ok	ok	ok	ok	low diversity	ok	260882	252463	1245	288808	15009	81790
p3_sample_1	p3	146	17300	694.0	1153.3333333	1:10 (2/2)	ok	ok	ok	ok	low diversity	ok	9380	5625	14181	14216	1736	3105
p3_sample_2	p3	501	66000	639.0	4400.0	1:1000 (1/2)	ok	ok	ok	ok	ok	ok	3768	2626	3712	3884	2005	29877
p3_sample_3	p3	797	12300	591.0	820.0	1:100 (2/2)	ok	ok	ok	ok	low diversity	ok	7297	6588	16256	16982	2602	4710
p3_sample_4	p3	1126	13000	511.0	866.666667	1:10 (1/2)	ok	ok	ok	ok	miss	ok	15782	19332	19453	36041	0	8860
p3_sample_5	p3	1476	12000	543.0	800.0	1:100 (1/2)	ok	ok	ok	ok	low diversity	ok	60029	42339	58400	95546	6856	33450
p3_sample_6	p3	1934	16000	500.0	1066.666667	1:100 (2/2)	ok	ok	ok	ok	miss	ok	50759	43633	6848	180596	0	75643
p3_sample_7	p3	2006	38000		2533.33333	1:100 (1/2)	ok	ok	low	ok	low diversity	ok	4257	12144	129	12366	1081	11809
p3_sample_8	p3	2344	75000	380.0	5000.0	1:1000 (2/2)	ok	ok	ok	ok	ok	ok	81451	125865	77784	136778	4004	101607
p3_sample_9	p3	2727	120000	310.0	8000.0	1:100 (2/2)	ok	miss	ok	ok	miss	ok	1064	38	4298	107672	0	3010
p3_sample_10	p3	3079	49000	140.0	3266.666667	1:1000 (1/2)	ok	ok	ok	ok	ok	ok	22603	11038	19896	56674	1117	39697
p5_sample_1	p5	134	49	521	3.2666667	1:10 (0/2)	miss	ok	ok	ok	ok	ok	0	1259	271	3946	1603	1029
p5_sample_2	p5	303	900	702	60.0	1:10 (2/2)	ok	ok	ok	ok	miss	ok	37820	2016	10669	9511	0	4560
p5_sample_3	p5	713	1400	430	93.3333333	1:10 (1/2)	ok	ok	ok	ok	low diversity	ok	15877	13284	25670	18400	4438	7467
p5_sample_4	p5	1057	8400	500	560.0	1:100 (2/2)	ok	ok	ok	ok	ok	ok	68800	55016	77592	83541	23015	45472
p5_sample_5	p5	1414	2600	382	173.3333333	1:10 (2/2)	ok	ok	ok	ok	ok	ok	21475	69054	1393	88600	32305	44546
p5_sample_6	p5	1813	10700	333	713.3333333	1:100 (1/2)	low diversity	ok	ok	ok	ok	ok	17793	9298	8564	21739	9721	20178
p5_sample_7	p5	2149	8770	228	584.6666667	1:100 (1/2)	low diversity	ok	ok	ok	ok	ok	19759	10773	14516	36435	8961	34167
p6_sample_1	p6	62	6800	480	453.3333333	1:100 (1/2)	ok	ok	ok	ok	ok	ok	9723	18910	8547	79772	1561	59292
p6_sample_2	p6	118	2900	440	193.3333333	1:100 (2/2)	ok	ok	ok	ok	ok	ok	832	23994	1059	42163	3714	20988
p6_sample_3	p6	974	100	590	6.6666667	1:10 (1/2)	end lower	ok	ok	ok	miss	ok	711	11063	235	21898	0	3979
p6_sample_4	p6	1293	2600	630	173.3333333	1:10 (1/2)	ok	ok	ok	ok	ok	ok	39259	68597	2162	125614	8589	31272
p6_sample_5	p6	1724	700	550	46.6666667	1:10 (1/2)	ok	ok	ok	ok	miss	ok	63782	60255	836	205178	0	9276
p6_sample_6	p6	2178	3280	418	218.6666667	1:100 (1/2)	ok	ok	ok	ok	ok	ok	26518	108660	113223	231201	17005	182576
p6_sample_7	p6	2556	34700	287	2313.3333333	1:100 (2/2)	ok	ok	ok	ok	ok	ok	91215	91387	23870	110004	18682	88489
p8_sample_1	p8	87	2900	460.0	193.3333333	1:10 (2/2)	ok	ok	ok	ok	ok	low	2052	1497	6186	553	410	58
p8_sample_2	p8	200	3900		260.0	1:100 (2/2)	ok	low	ok	ok	ok	ok	16991	426	17642	36590	2229	13776
p8_sample_3	p8	570	12400	1271.0	826.6666667	1:100 (2/2)	ok	ok	ok	ok	ok	ok	4076	3855	4720	3884	4005	2581
p8_sample_4	p8	1003	37900	535.0	2526.6666667	1:100 (2/2)	ok	ok	ok	ok	ok	ok	49527	69203	6303	83529	20873	42841
p8_sample_5	p8	1437	34200	335.0	2280.0	1:100 (2/2)	ok	ok	ok	ok	ok	ok	7728	8619	7097	12106	8489	5693
p8_sample_6	p8	1810	103000	430.0	6866.6666667	1:1000 (2/2)	ok	ok	low	low diversity	low diversity	ok	66214	43628	274	74928	12534	44308
p8_sample_7	p8	2208	530000	378.0	35333.3333333	1:10000 (1/2)	low diversity	ok	ok	low diversity	ok	ok	26201	90377	30745	293101	61872	13836
p9_sample_1	p9	106	2300	720.0	153.3333333	1:10 (2/2)	ok	ok	ok	ok	ok	ok	32359	22032	41521	10420	325	2438
p9_sample_2	p9	227	2000		133.3333333	1:10 (2/2)	ok	ok	ok	ok	low diversity	ok	29556	39163	918	41600	3551	6298
p9_sample_3	p9	813	1000	870.0	66.6666667	1:10 (0/2)	ok	ok	ok	ok	low diversity	ok	6094	3263	11970	20138	3365	2370
p9_sample_4	p9	1193	1100	1000.0	73.3333333	1:10 (2/2)	ok	ok	ok	miss	miss	ok	1970	1895	6350	24134	0	624
p9_sample_5	p9	1815	3900	1094.0	260.0	1:10 (2/2)	ok	ok	ok	ok	low diversity	ok	37909	35605	69737	56606	4901	10109
p9_sample_6	p9	2214	120000	1150.0	8000.0	1:100 (1/2)	ok	ok	ok	ok	ok	ok	130459	58255	6212	156862	11393	41574
p9_sample_7	p9	2608	28800	669.0	1920.0	1:1000 (1/2)	ok	ok	ok	ok	miss	ok	139743	49422	5233	65522	0	66369
p9_sample_8	p9	2955	35000	158.0	2333.3333333	1:100 (2/2)	ok	ok	ok	ok	ok	ok	19907	19306	15360	18657	2016	19127
p10_sample_1	p10	33	0	0.0	0.0	1:1000 (2/2)	ok	ok	ok	ok	ok	ok	24446	21925	29618	18920	22316	24394
p10_sample_2	p10	66	594000	0.0	39600.0		ok	ok	ok	ok	miss	ok	2570	3293	1080	36821	0	20658
p10_sample_3	p10	68	164000	420.0	10933.333333	1:10 (2/2)	end lower	ok	low	ok	miss	miss	234	4515	142	8238	0	0
p10_sample_4	p10	374	0		0.0	1:1 (1/1)	ok	ok	ok	ok	miss	ok	1682	7262	24171	16119	0	2365
p10_sample_5	p10	530	0	480.0	0.0	1:10 (0/2)	miss	miss	miss	low diversity	miss	miss	0	0	0	1860	0	0
p10_sample_6	p10	912	0	430.0	0.0	1:10 (2/2)	low diversity	ok	ok	ok	miss	ok	4181	8463	12955	17758	0	11665
p10_sample_7	p10	1004	0	460.0	0.0	1:100 (1/2)	low diversity	low diversity	ok	miss	miss	miss	10521	2500	8017	0	0	0
p10_sample_8	p10	2229	12000		800.0	1:100 (1/2)	ok	ok	ok	ok	ok	ok	19561	17509	19002	21280	3643	10512
p10_sample_9	p10	2256	10500		700.0	1:10 (0/2)	ok	low diversity	ok	ok	miss	low diversity	8633	11318	12597	12437	0	534
p11_sample_1	p11	209	12700	850	846.66666667	1:100 (2/2)	ok	ok	ok	ok	ok	ok	29449	33593	36474	6152	1350	2923
p11_sample_2	p11	332	18100	845	1206.66666667	1:100 (1/2)	ok	ok	ok	ok	ok	ok	3019	45706	4249	6252	2143	2591
p11_sample_3	p11	572	28000	690	1866.66666667	1:10 (1/2)	ok	ok	ok	ok	ok	ok	12631	13960	20707	14816	4037	3204
p11_sample_4	p11	1026	13000	566	866.66666667	1:100 (2/2)	ok	ok	ok	ok	ok	ok	20495	21346	8781	23706	12143	14227
p11_sample_5	p11	1396	63000	663	4200.0	1:100 (2/2)	ok	ok	ok	ok	ok	ok	82719	49873	10354	113404	4980	63005
p11_sample_6	p11	1750	476000	423	31733.333333	1:1000 (1/2)	ok	ok	ok	ok	miss	ok	27296	33885	20511	24230	0	31280
p11_sample_7	p11	2043	28000	251	1866.66666667	1:1000 (2/2)	ok	ok	ok	ok	ok	ok	16072	20203	18913	10944	8538	12793
