# Supplementary material for: Population genomics of intrapatient HIV-1 evolution
Source: eLife journal article supplement (doi:10.7554/elife.11282), 2015-12-10
Supplement: supp [file elife-11282-supp-v1.zip › elife_poa_e11282_Supplementary_File_2.xlsx]

## Sheet: Sheet1
S2 Table. A list of all primers used to amplify the HIV genome.
Fragment	Primer name	Sequence
1	F1a_fwb1c_524d_547e	CTC AAT AAA GCT TGC CTT GAG TGC
1	F1_rev1_2347_2324	ACT GTA TCA TCT GCT CCT GTR TCT
1	F1_fw2_ 551_571	AAG TAG TGT GTG CCC GTC TGT
1	F1_rev2_2272_2252	TGC CAA AGA GTG ATY TGA GGG
2	F2_fw1_1998_2015	AAA TTG CAG GGC YCC TAG
2	F2_rev1_3892_3869	CTR TTA GCT GCC CCA TCT ACA TAG
2	F2_fw2_2022_2039	GGG CTG TTG GAR ATG TGG
2	F2_rev2_3799_3777	ACA AAC TCC CAY TCA GGA ATC CA
3a	F3_fw1_3630_3657	CAC ACT AAT GAT GTA ARA CAR TTA ACA G
3a	F3a_rev1_5105_5077	GGG ATG TGT ACT TCT GAA CTT AYT YTT GG
3a	F3_fw2_3681_3703	GAA AGC ATA GTR ATA TGG GGA AA
3a	F3_rev2_5061_5040	CAC CTG CCA TCT GTT TTC CAT A
3b	F3_fw1_3630_3657	CAC ACT AAT GAT GTA ARA CAR TTA ACA G
3b	F3b_rev1_5213_5186	GGG ATG TGT ACT TCT GAA CTT AYT YTT GG
3b	F3_fw2_3681_3703	GAA AGC ATA GTR ATA TGG GGA AA
3b	F3_rev2_5061_5040	CAC CTG CCA TCT GTT TTC CAT A
4	F4_fw1_4899_4922	CGG GTT TAT TWC AGR GAC AGC AGA
4	F4_rev1_6595_6571	GGG GTT AAY TTT ACA CAT GGY TTT A
4	F4_fw2_4956_4974	TGG AAA GGT GAA GGG GCA G
4	F4_rev2_6450_6429	GTA CAC AGG CAT GTG TRG CCC A
5a	F5a_fw1_5960_5983	GGC ATY TCC TAT GGC AGG AAG AAG
5a	F5a_rev1_8041_8016	GTG GTG CAR ATG AGT TTT CCA GAG CA
5a	F5a_fw2_6198_6222	TAA GAG AAA GAG CAG AAG ACA GTG G
5a	F5a_rev2_8012_7989	CCA AAT YCC YAG GAG CTG TTG ATC
5b	F5b_fw1_6194_6216	AGA ATA AGA GAA AGA GCA GAA GA
5b	F5b_rev1_8032_8010	ATG AGT TTT CCA GAG CAN CCC CA
5b	F5b_fw2_6337_6359	TCT ATT ATG GRG TAC CTG TRT GG
5b	F5b_rev2_8012_7992	CCA AAT YCC YAG GAG CTG TTG
6	F6_fw1_7785_7807	GGG TTC TTR GGA RCA GCA GGA AG
6	F6_rev1_9614_9592	ATT GAG GCT TAA GCA GTG GGT TC
6	F6_fw2_7801_7819	CAG GAA GCA CTA TGG GCG C
6	F6_rev2_9582_9567	CCA GAG AGC TCC CAG G
	a Fragment number.
	b Primer direction
	c Primer position, 1= outer primer 2= inner primer.
	d Start position of the primer according to HXB2 coordinates.
	e Stop position of the primer according to HXB2 coordinates.
