# Supplementary material for: Population genomics of intrapatient HIV-1 evolution
Source: eLife journal article supplement (doi:10.7554/elife.11282), 2015-12-10
Supplement: supp [file elife-11282-supp-v1.zip › elife_poa_e11282_Supplementary_File_3.xlsx]

## Sheet: EDI calculation details
							Midpoint estimate					PHI estimate			Fiebig estimate						BED estimate
Patient code	Subtype	First CD4 date	First CD4 level	First virus load date	First virus load level		Last neg Ab date	First pos Ab date	Days neg-pos	Infect date midpoint		Documented PHI	Infect date PHI		HIV serology date	HIV serology	Fiebig	Fiebig days	Infect date Fiebig		BED sample date	BED ODn	BED days since infection	Infect date BED		Estimated date of infection (EDI)	EDI method	Date of first sequenced sample	Days between EDI and first sequence	Date of last sequence	Days between EDI and last seqeunce	Years between EDI and last sequence
p1	AE	1996-11-08	537	1996-11-08	<500		1996-01-01	1996-11-06	310	1996-06-04		No			1996-10-17	ELISA +; WB + (p31+); Ag -	VI	>100	1996-07-09		1996-11-08	0.419	85.039	1996-08-14 23:03:49		1996-07-09	BED + Fiebig VI	1996-11-08	122	2004-09-21	2996	8.20822
p2	B	2002-10-10	1185	2002-10-10	31100		2001-08-30	2002-10-01	397	2002-03-16 12:00:00		No			2002-10-01	ELISA +; WB + (p31-); Ag nd	V	65	2002-07-28		2002-10-10	0.171	61.2372	2002-08-09 18:18:29		2002-07-28	Fiebig V	2002-10-10	74	2008-02-05	2018	5.52877
p3	B	2000-01-27	694	2000-01-27	17300		1998-07-01	2000-01-27	575	1999-04-14 12:00:00		No			2000-01-18	ELISA +; WB + (p31+); Ag nd	VI	>100	1999-10-10		2000-01-27	0.898	145.703	1999-09-03 07:06:59		1999-09-03	BED	2000-01-27	146	2008-02-07	3079	8.43562
p5	B	2003-04-23	521	2003-04-23	<50		2002-09-05	2003-03-20	196	2002-12-12		No			2003-03-20	ELISA +; WB + (p31+); Ag nd	VI	>100	2002-12-10		2003-03-20	0.153	60	2003-01-19		2002-12-10	BED + Fiebig VI	2003-04-23	134	2008-10-28	2149	5.88767
p6	C	2002-11-26	480	2002-11-26	6800		2002-10-12	2002-11-26	45	2002-11-03 12:00:00		2002-10-12	2002-09-25		2002-11-07	ELISA +; RIBA indet ; Ag -	IV	27	2002-10-11		2003-01-21	0.29	72.1557	2002-11-09 20:15:49		2002-09-25	PHI	2002-11-26	62	2009-09-24	2556	7.00274
p8	B	1998-07-15	460	1998-07-15	2900		1997-08-28	1998-06-23	299	1998-01-24 12:00:00		No			1998-06-23	ELISA +; WB + (p31-); Ag nd	V	65	1998-04-19		1998-07-15	0.158	60.0983	1998-05-15 21:38:26		1998-04-19	Fiebig V	1998-07-15	87	2004-05-05	2208	6.04932
p9	B	1997-03-10	720	1997-03-10	2300		1995-06-15	1997-02-18	614	1996-04-17		No			1997-03-04	ELISA +; WB + (p31+); Ag nd	VI	>100	1996-11-24		1997-03-10	0.277	70.9455	1996-12-29 01:18:26		1996-11-24	BED + Fiebig VI	1997-03-10	106	2004-12-27	2955	8.09589
p10	B	1990-07-26	420	1990-07-24	594000		1990-06-05	1990-06-21	16	1990-06-13		1990-06-05	1990-05-19		1990-06-21	ELISA -; Ag +	II	18	1990-06-03		1990-06-21	0.101	55.1048	1990-04-26 21:29:01		1990-05-19	PHI	1990-06-21	33	1996-07-22	2256	6.18082
p11	B	2001-04-19	850	2001-04-19	12700		1999-07-01	2001-04-03	642	2000-05-17		No			2001-04-03	ELISA +; WB + (p31+); Ag nd	VI	>100	2000-12-24		2001-04-19	1.222	208.047	2000-09-22 22:52:31		2000-09-22	BED	2001-04-19	208	2006-04-27	2043	5.59726

## Sheet: Details on individuals patients
Details on EDI (estimated date of infection) of individual patients
Patient 1
EDI was based on a combination Fiebig staging and BED test results, because he patient was in Fiebig stage VI (i.e. >100 days since EDI), whereas BED testing on a sample obtained 22 days later indicated a shorter time (85 days) since EDI. Based on these data EDI was placed 100 days before date for HIV serology for Fiebig staging. The first sequenced sample was obtained 122 days after EDI. The fir…
Patient 2
EDI was based on Fiebig stage V. BED also indicates early infection (61 days).The first sequenced sample was obtained 74 days after EDI.
Patient 3
Fiebig stage VI indicated >100 days since EDI. Therefore EDI was based on the BED test result that indicated that the first sample used for sequencing (and BED testing) was obtained 146 days after EDI.
Patient 5
EDI was based on a combination Fiebig staging and BED test results, because he patient was in Fiebig stage VI (i.e. >100 days since EDI), whereas BED testing on the same sample indicated a shorter time (60 days) since EDI. Based on these data EDI was placed 100 days before date for HIV serology for Fiebig staging. The first sequenced sample was obtained 134 days after EDI and had a VL of <50.
Patient 6
EDI was based on a laboratory-confirmed primary HIV infection (PHI). Fiebig staging and BED agrees relatively well with this EDI. Note that Fiebig staging was based on RIBA testing instead of Western blot (WB) because no sample remained for retrospective WB testing. The first sample for sequencing was obtained 62 days after EDI and had a VL of 6800.
Patient 8
EDI was based on Fiebig V. Based on this EDI the first sequenced sample was obtained 87 days after EDI. BED agrees quite well with this EDI.
Patient 9
EDI was based on a combination of Fiebig staging and BED test results. Fiebig stage VI indicated >100 days since EDI, whereas BED testing on a sample obtained 6 days later indicated a shorter time (71 days) since EDI. Based on these data EDI was placed 100 days before the date of sampling for Fiebig staging, which meant that the first sample used for sequencing was obtained 106 days after EDI.
Patient 10
EDI was based on laboratory confirmed primary HIV infection. EDI based on Fiebig staging and BED agrees quite well with this EDI. The first sample for sequencing was obtained 33 days after EDI.
Patient 11
EDI was based on a combination of Fiebig staging and BED test results. Fiebig stage VI indicated >100 days since EDI, whereas BED testing on a sample obtained 16 days later indicated 208 days since EDI. Based on these data EDI was placed 208 days before the date of sampling for BED testing. This was also the first sample used for sequencing.
