# Supplementary figures and images for: Population genomics of intrapatient HIV-1 evolution
Source: eLife journal article supplement (doi:10.7554/elife.11282), 2015-12-10

SNP frequency trailing fragment

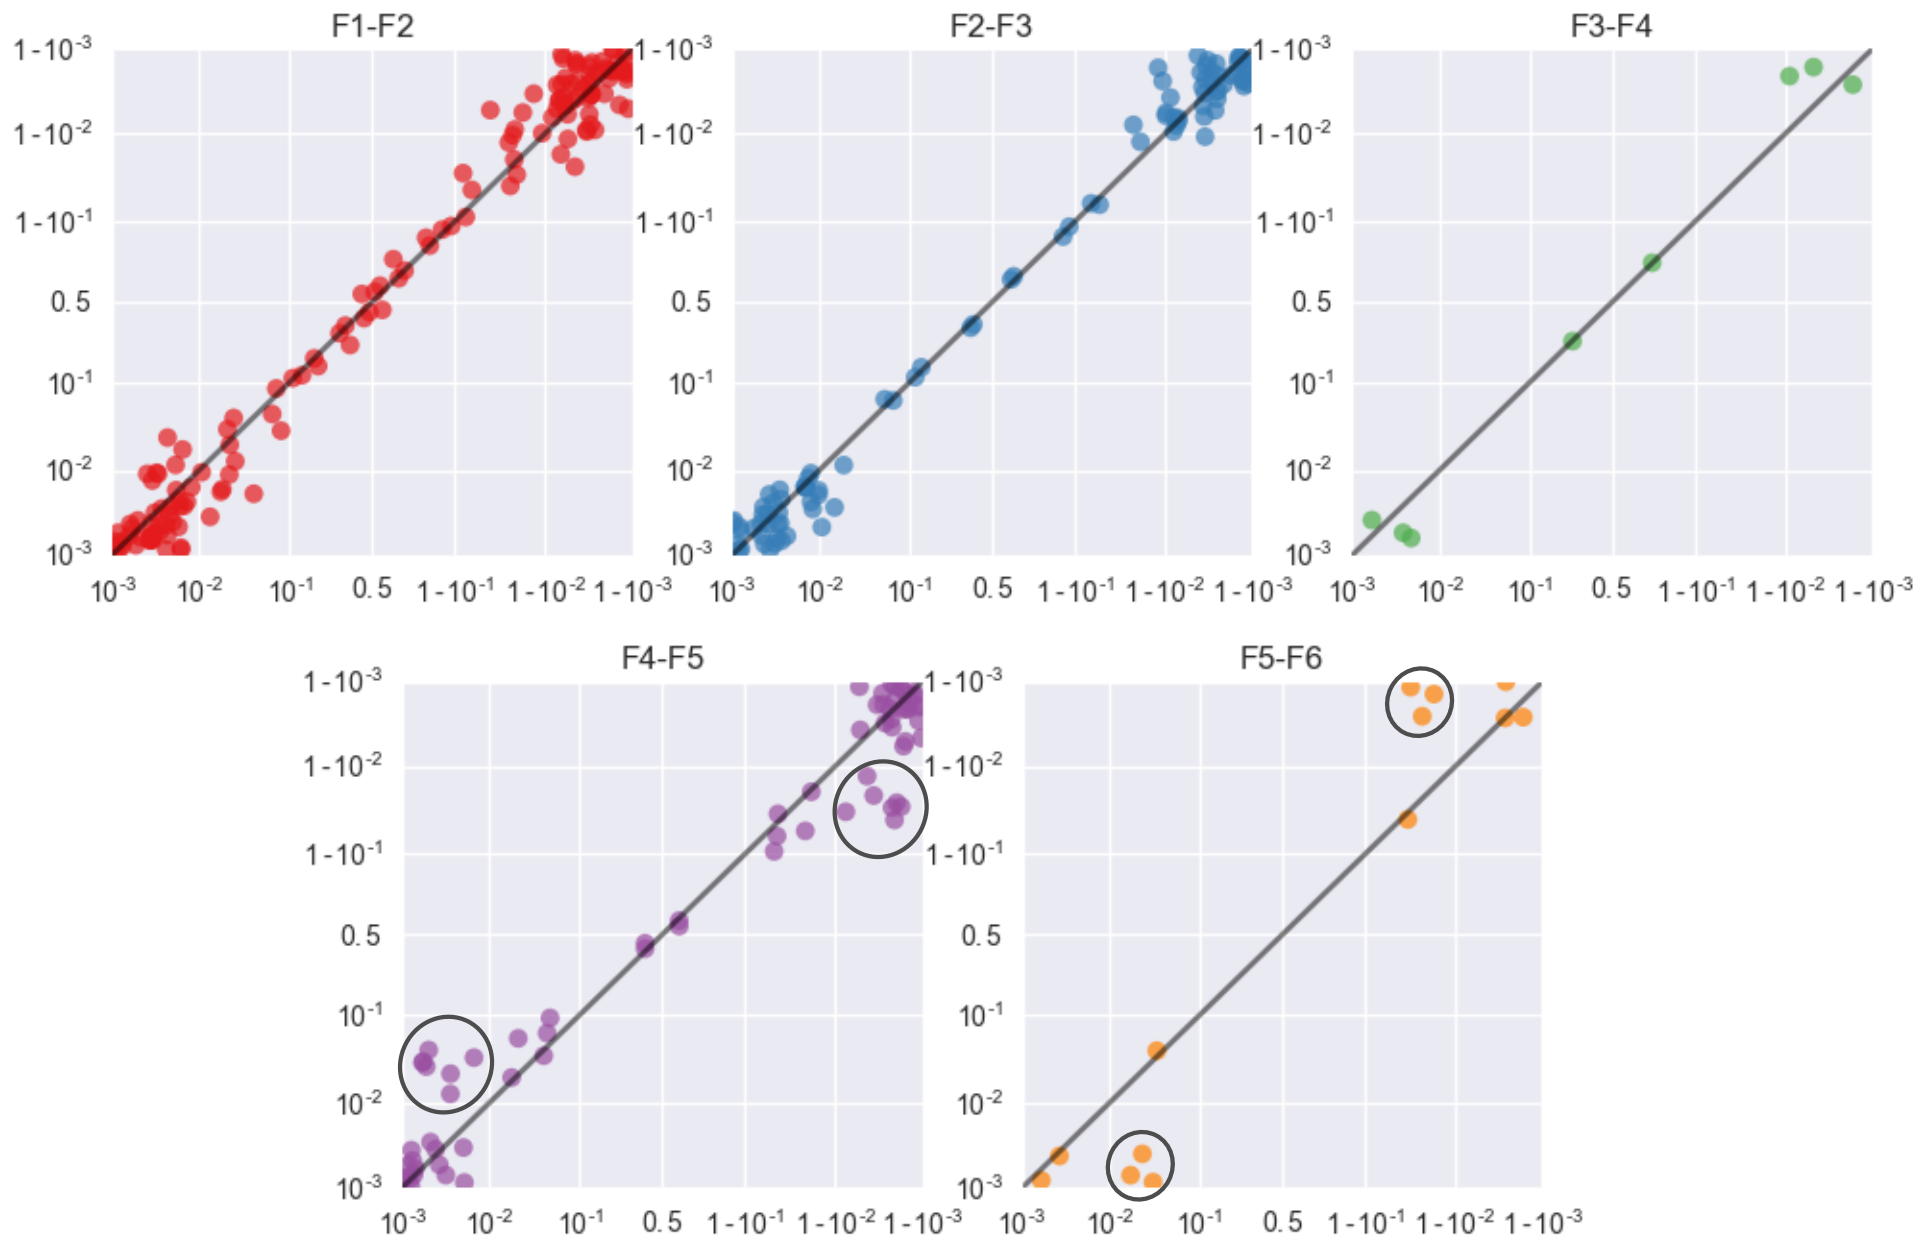

SNP frequency leading fragment

Supplement: supp [file elife-11282-supp-v1.zip]

Spearman's  $\rho$

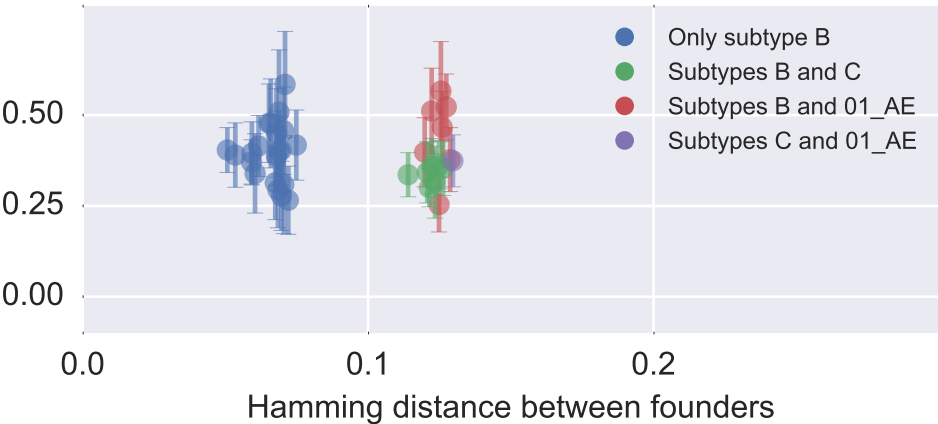

Supplement: supp [file elife-11282-supp-v1.zip]

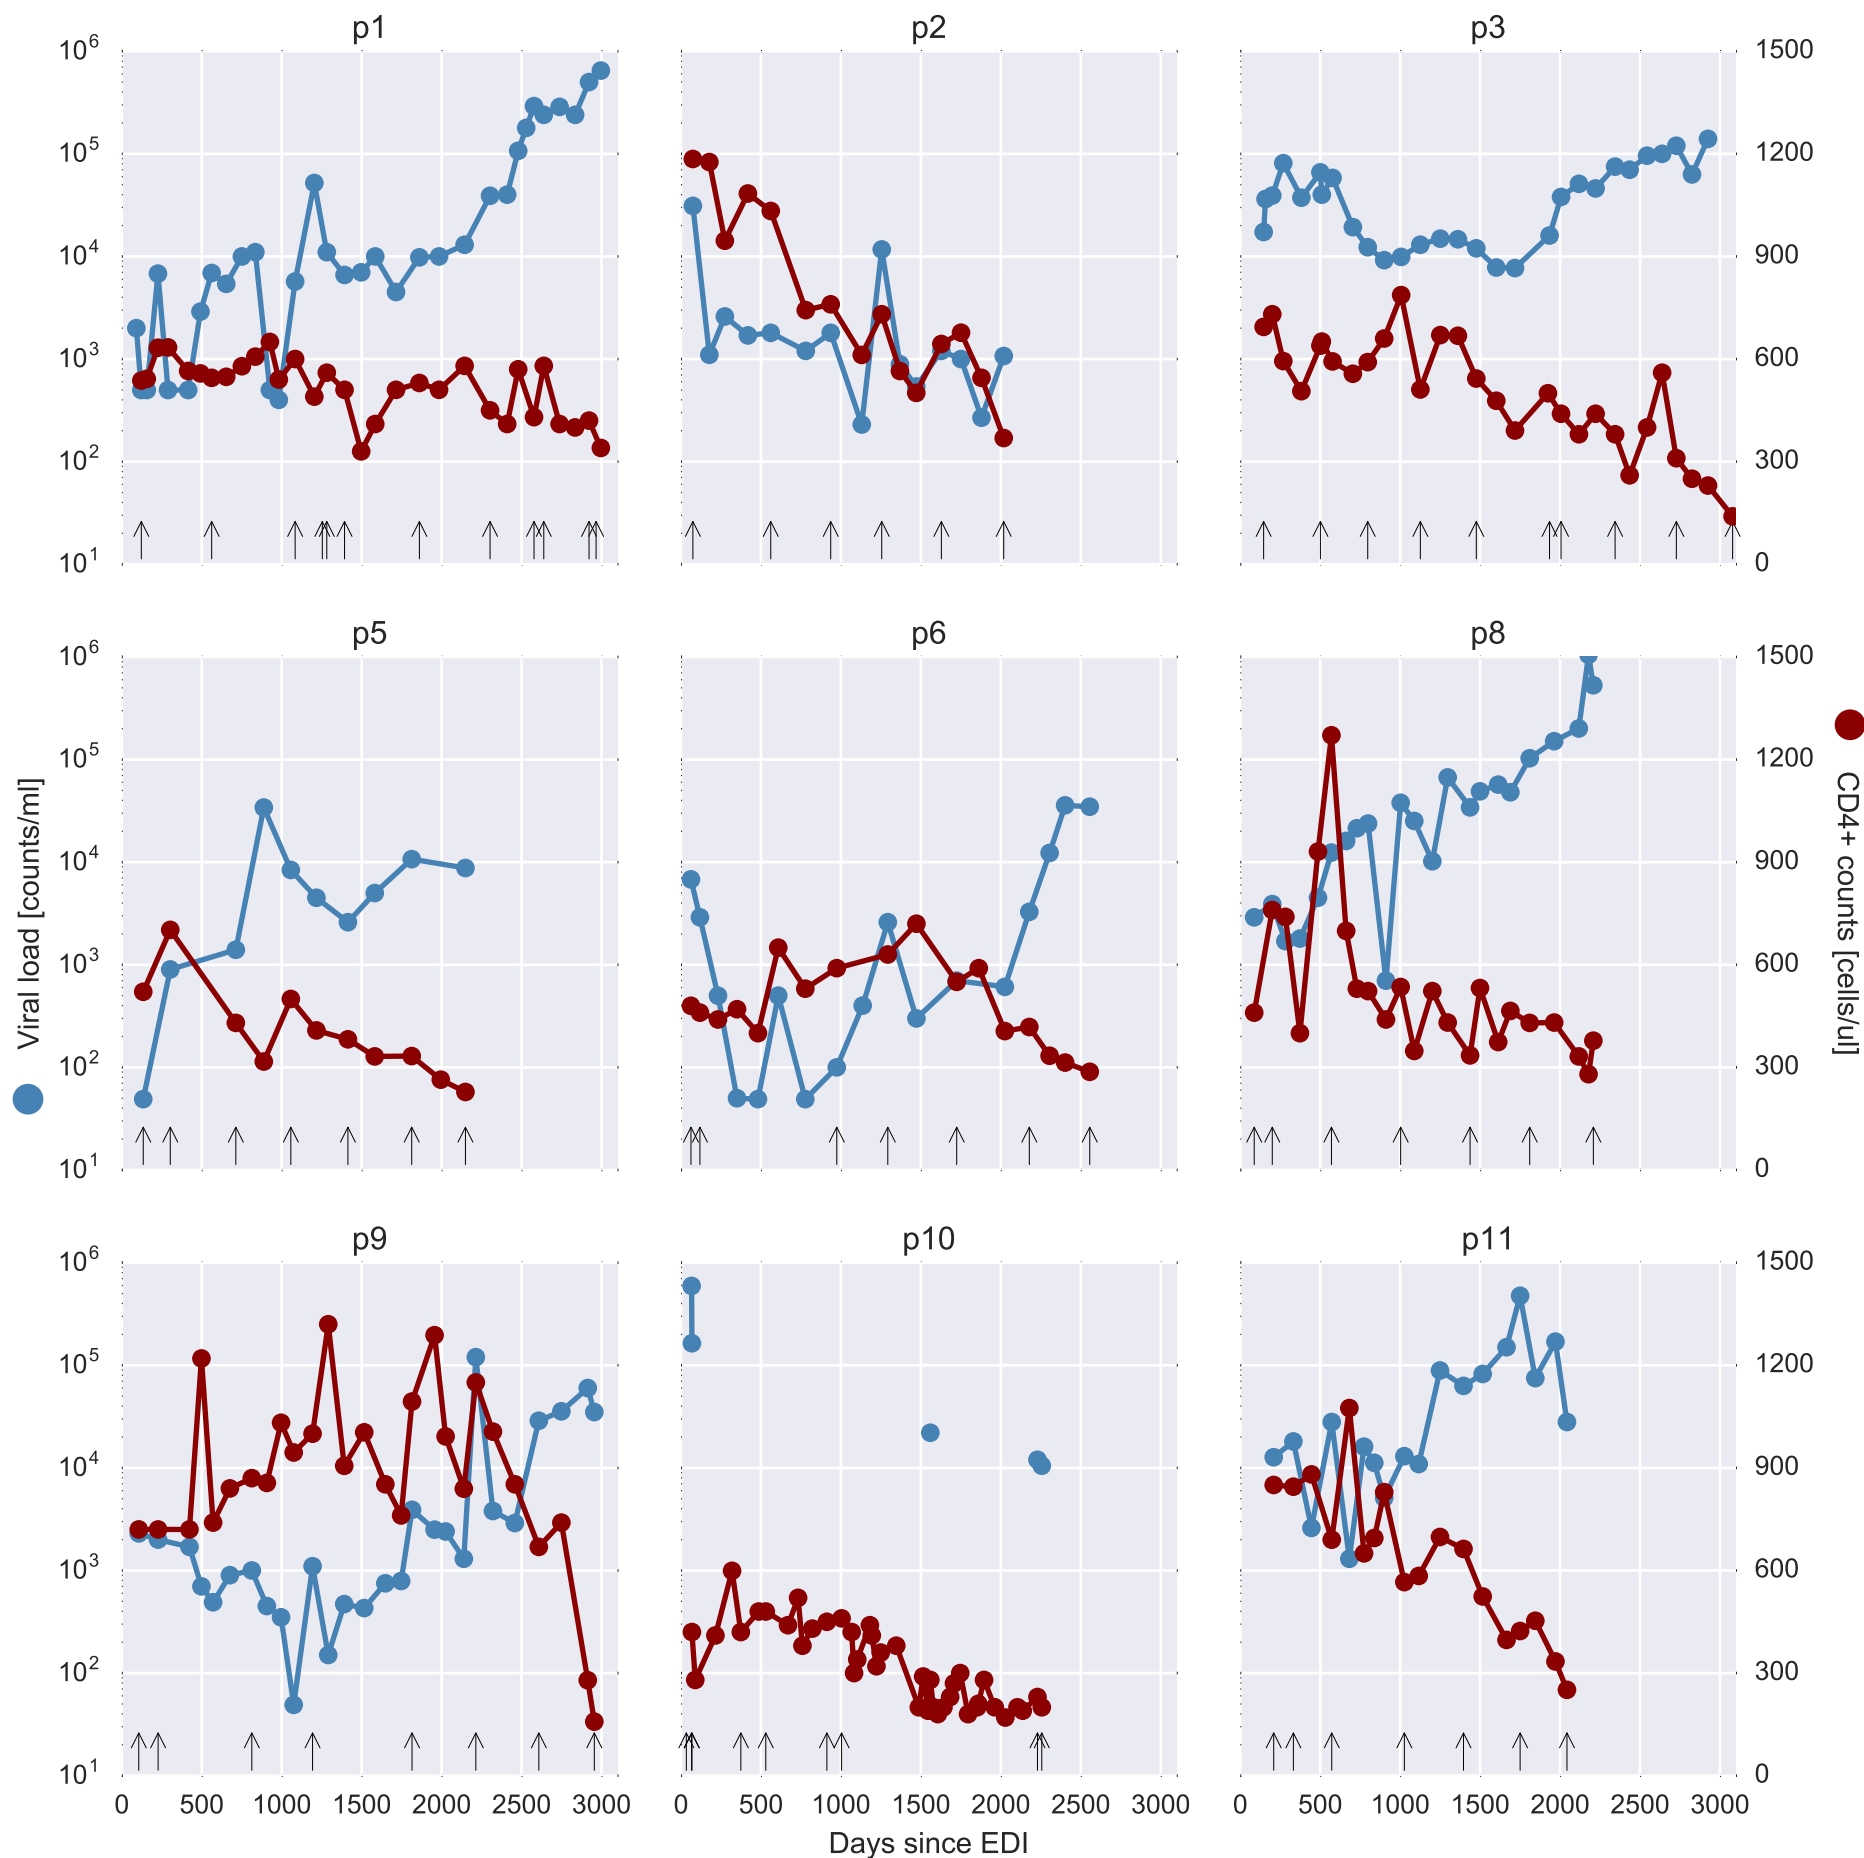

Supplement: supp [file elife-11282-supp-v1.zip › elife_poa_e11282_Figure_1_figure_supplement_1.pdf]

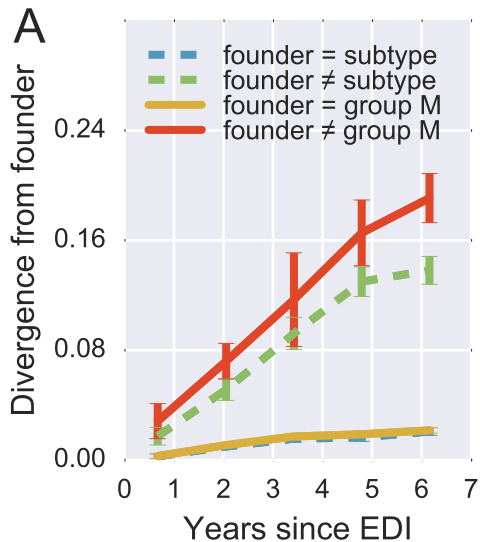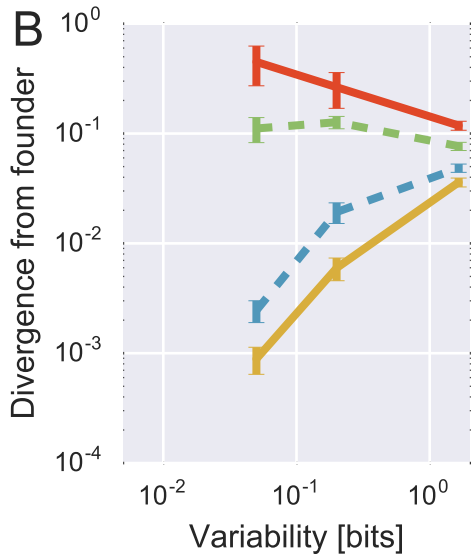

Supplement: supp [file elife-11282-supp-v1.zip › elife_poa_e11282_Figure_6_figure_supplement_1.pdf]

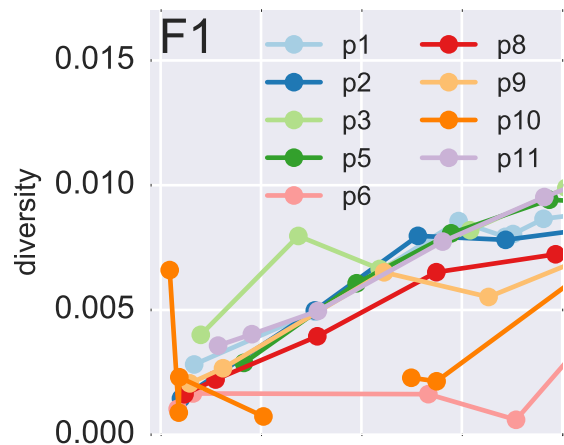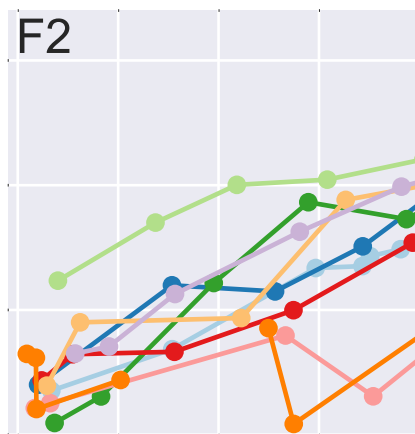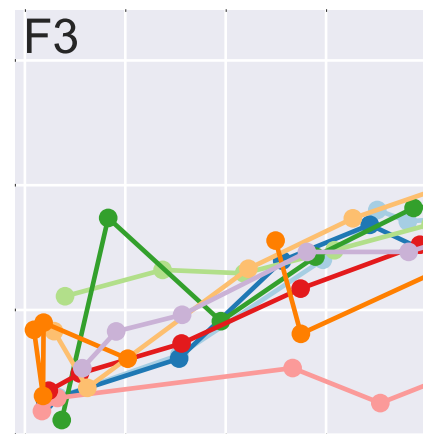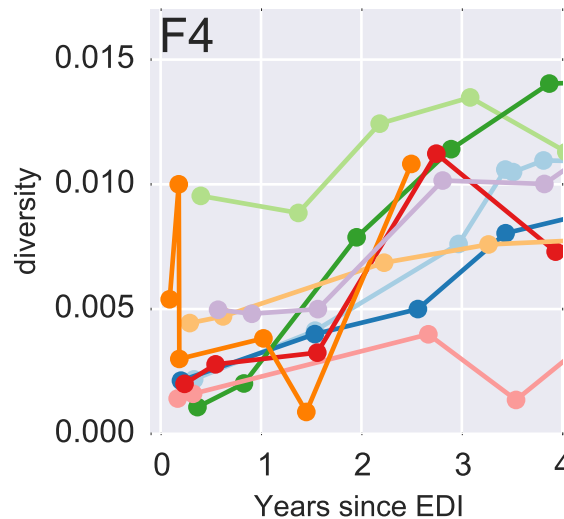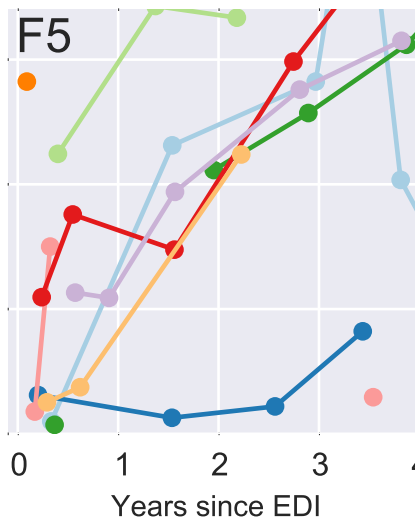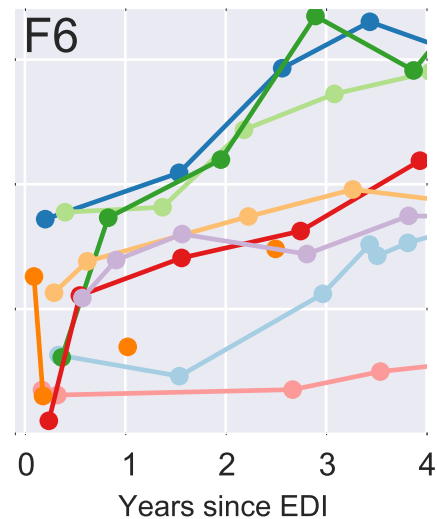

Supplement: supp [file elife-11282-supp-v1.zip › elife_poa_e11282_Figure_3_figure_supplement_1.pdf]

Divergence rate [1/site/year]

## Patients

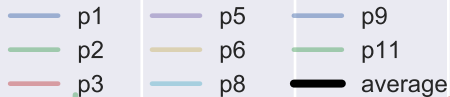

$10^{-2}$

$10^{-3}$

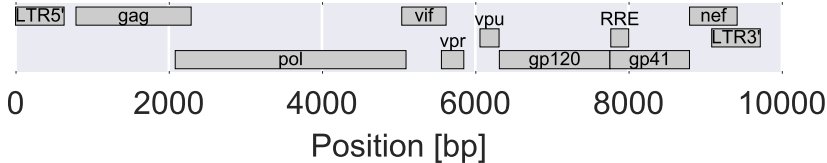

Supplement: supp [file elife-11282-supp-v1.zip › elife_poa_e11282_Figure_3_figure_supplement_2.pdf]

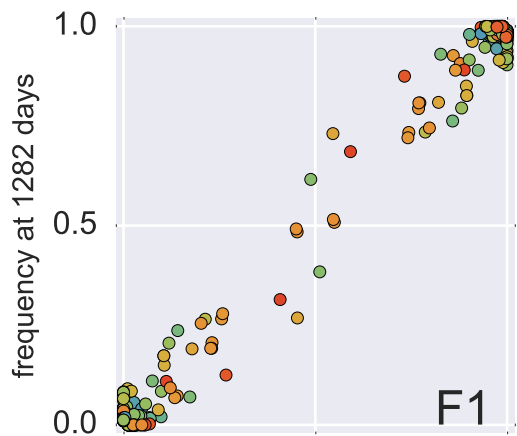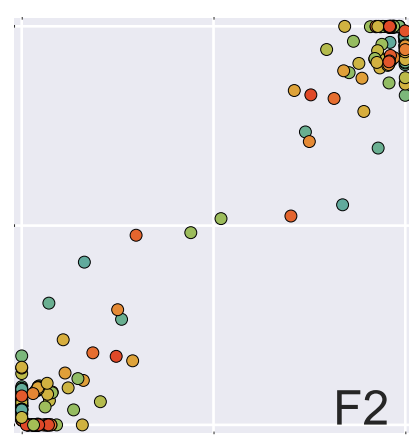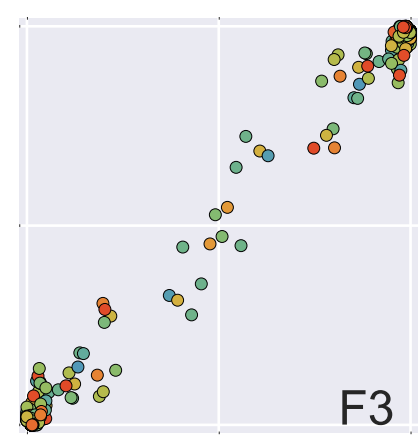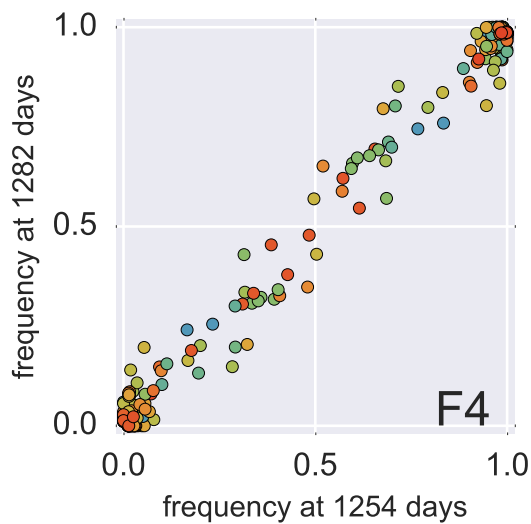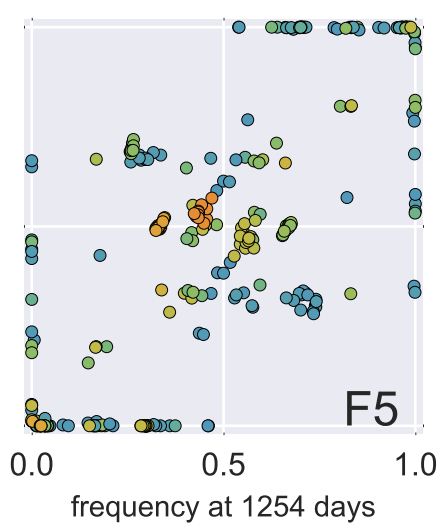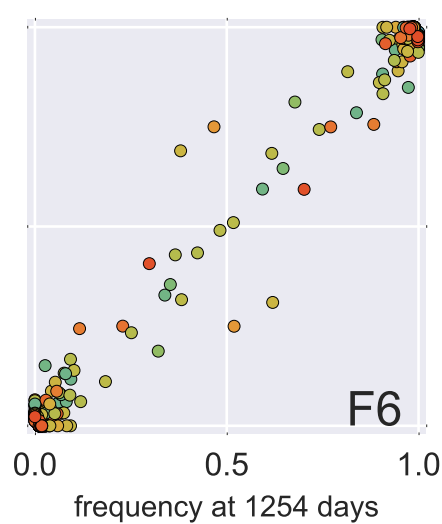

Supplement: supp [file elife-11282-supp-v1.zip › elife_poa_e11282_Figure_9_figure_supplement_1.pdf]

**A**Spearman's  $\rho$ 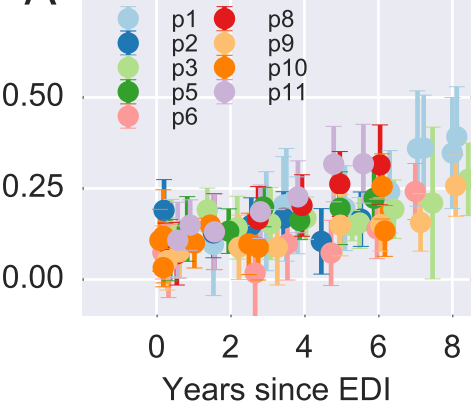**B**Fraction of SNPs  $> 0.01$ 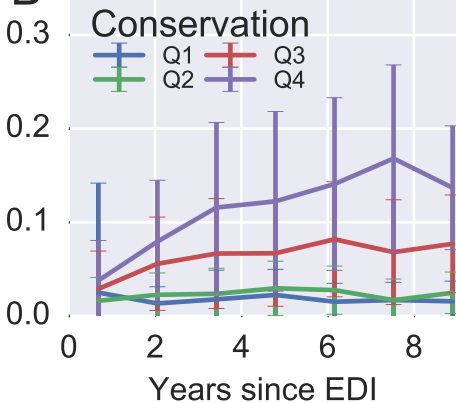

Supplement: supp [file elife-11282-supp-v1.zip › elife_poa_e11282_Figure_4_figure_supplement_1.pdf]

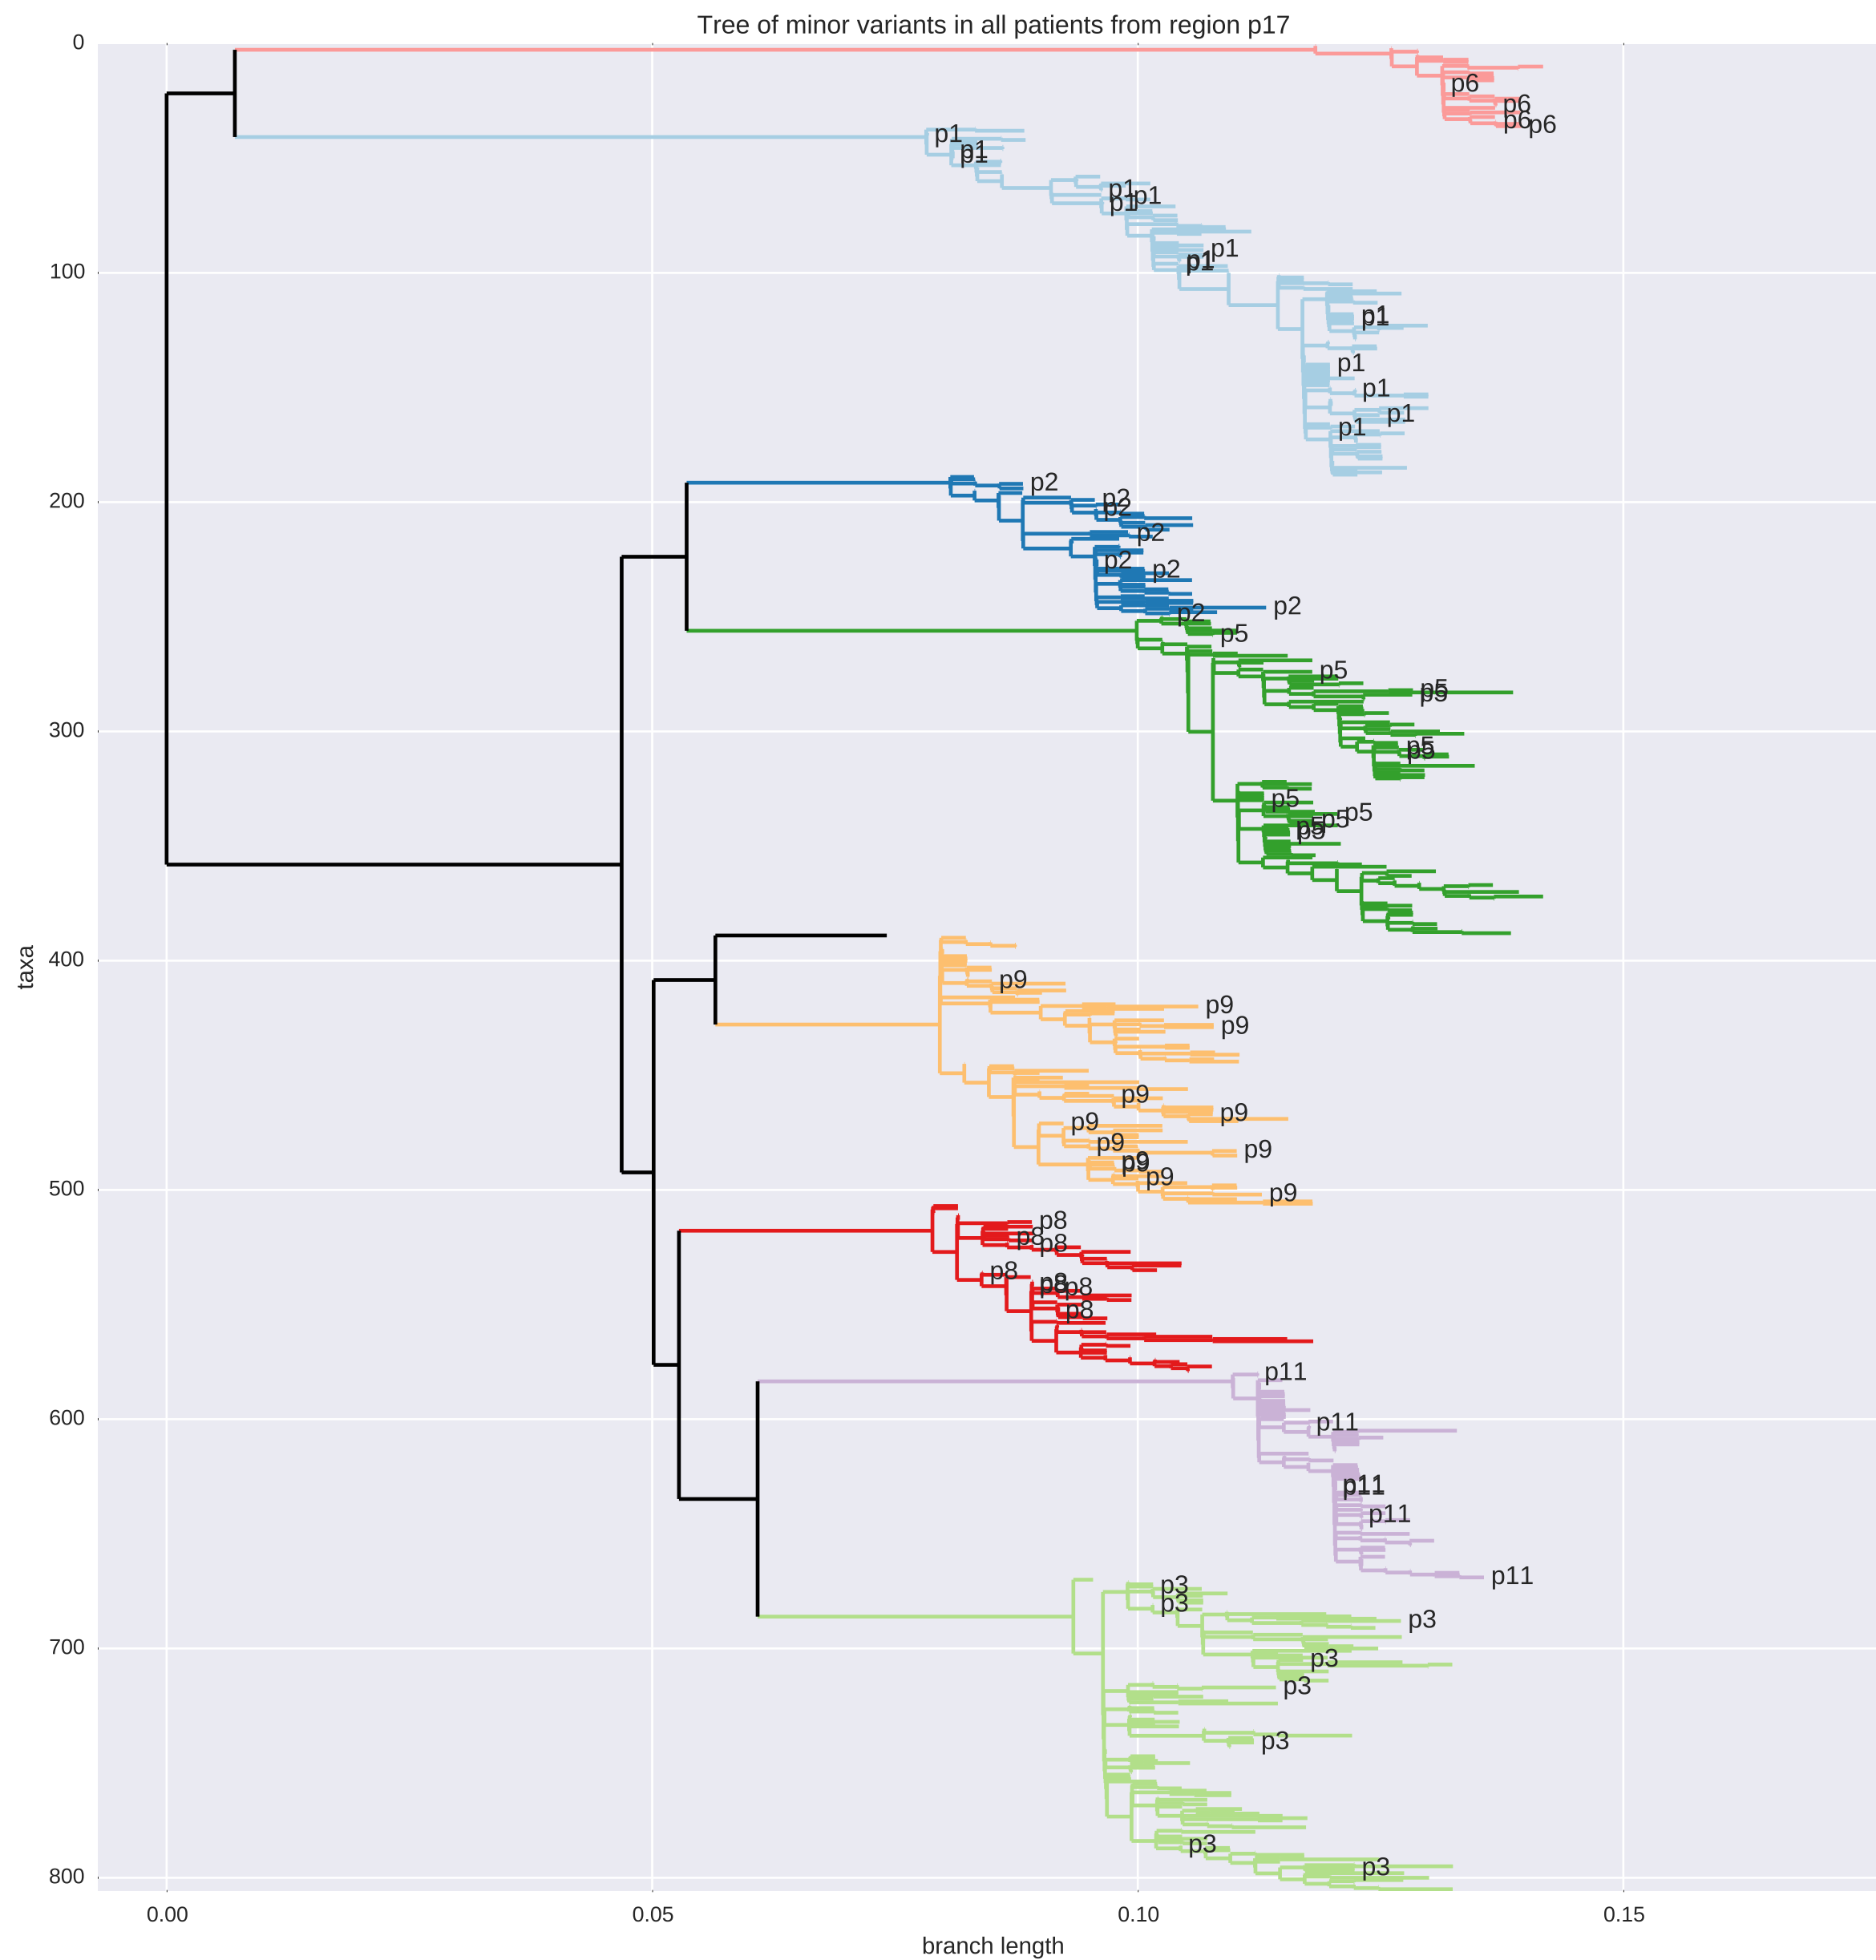

Supplement: supp [file elife-11282-supp-v1.zip]
